# Supplementary material
Source: publisher figshare collection journal article supplement (https://future-science-group.figshare.com/ndownloader/files/31547510)
Supplement: Supplementary file 1 [file 31547510]

| Patient Characteristics |  | Control | HTN | HTN + cDM | HTN + uncDM |
| --- | --- | --- | --- | --- | --- |
| Age (years) |  | 56.5 ± 12.0 | 62.8 ± 10.7 | 73.8 ± 7.9 | 68.8 ± 8.5 |
| Gender (Male) |  | 75% | 100% | 50% | 50% |
| BMI (kg/m2) |  | 29.9 ± 4.9 | 31.5 ± 8.3 | 30.4 ± 5.4 | 32.8 ± 6.4 |
| Operation (%) |  |  |  |  |  |
|  | CABG | 25% | 100% | 100% | 75% |
|  | CABG + Other | 0% | 0% | 0% | 25% |
|  | Valve Surgery | 75% | 0% | 0% | 0% |
| Hemoglobin A1c (%) |  | 5.7 ± 0.5 | 5.7 ± 0.3 | 6.4 ± 0.4 | 8.1 ± 0.8 |
| Average Pre-Op Glucose (mg/dL)* |  | 99.5 ± 4.9 | 98 ± 8.2 | 131.7 ± 29.7 | 135 ± 11.9 |
| Average Blood Pressure*† (mmHg) |  | 129.8 ± 17.7 / 74.5 ± 19.1 | 151.3 ± 19.6 /  82.5 ± 3.9 | 142 ± 13.5 /  64 ± 13.2 | 132.8 ± 19.4 /  61.3 ± 12.9 |
| On Antihypertensive Medication (%) |  | 0% | 75% | 75% | 50% |
| LFTs (IU/L) | Alkaline phosphatase | 90.5 ± 36.6 | 77.8 ± 10.2 | 60.8 ± 16.4 | 77.5 ± 23.1 |
|  | AST | 17.3 ± 4.6 | 34.8 ± 20.9 | 17.8 ± 4.3 | 41.5 ± 24.4 |
|  | ALT | 15.8 ± 2.5 | 16.8 ± 6.2 | 15.5 ± 7.0 | 33.8 ± 30.9 |
|  | Total Bilirubin | 0.7 ± 0.5 | 0.6 ± 0.1 | 0.5 ± 0.3 | 0.7 ± 0.3 |
| Lipid Profile (mg/dL) |  |  |  |  |  |
|  | Total cholesterol | 135.0 ± 54.8 | 151.7 ± 15.1 | 174.0 ± 80.5 | 158.0 ± 55.1 |
|  | LDL | 85.0 ± 38.3 | 86.3 ± 12.7 | 104.3 ± 60.4 | 96.0 ± 39.0 |
|  | HDL | 30.0 ± 13.0 | 33.0 ± 10.1 | 36.5 ± 6.0 | 29.0 ± 12.1 |
| Diagnosis of PAD (%) |  | 0% | 0% | 25% | 25% |
| Total Cardioplegia Time (min)‡ |  | 60.5 ± 26.0 | 76.5 ± 35.9 | 80.8 ± 17.9 | 72.3 ± 25.9 |
| Total CPB Time (min)‡ |  | 76.5 ± 28.5 | 94.8 ± 46.7 | 101.5 ± 24.6 | 87.5 ± 31.3 |
| Length of Stay§ (days) |  | 9.3 ± 5.8 | 6 ± 1.8 | 7 ± 2 | 6 ± 1.7 |
| * = Only calculated for patients whose information was accessible in the medical chart  † = Blood pressure taken preoperatively on the morning of surgery  ‡ = Calculated after exclusion of outlier values § = From day of surgery to day of discharge  HTN = Hypertension  cDM = Controlled Diabetes Mellitus  uncDM = Uncontrolled Diabetes Mellitus  CABG = Coronary Artery Bypass Grafting  BMI = Body Mass Index  LFTs = liver function tests  PAD = Peripheral Artery Disease  CPB = Cardiopulmonary Bypass |  |  |  |  |  |
